# Supplementary material for: Androgen receptor gain in circulating free DNA and splicing variant 7 in exosomes predict clinical outcome in CRPC patients treated with abiraterone and enzalutamide
Source: PubMed Central journal article supplement (PMC8134038; doi:10.1038/s41391-020-00309-w), 2021-01-26

### AR-gain PFS ABIRATERONE

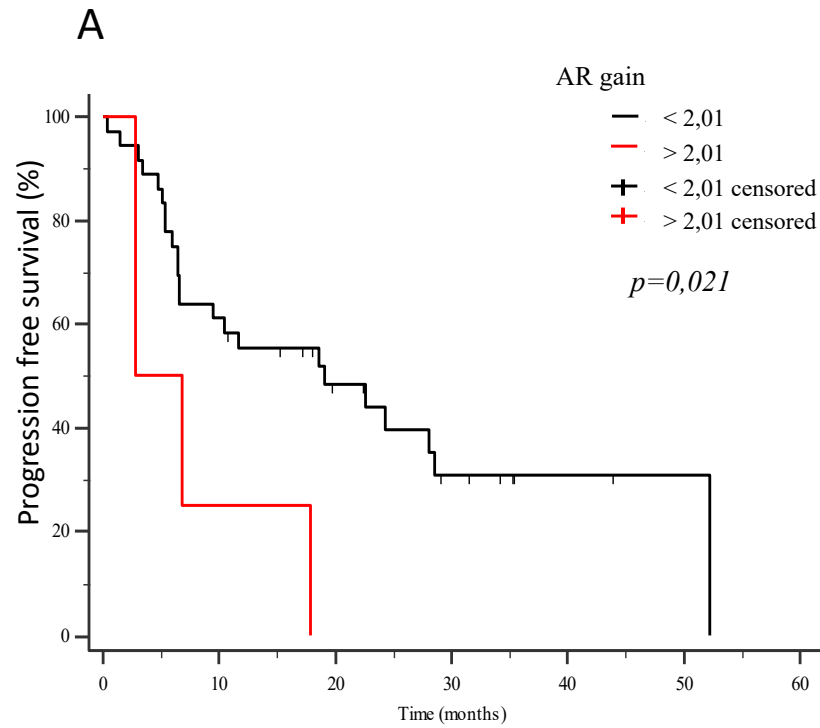

### AR-gain OS ABIRATERONE

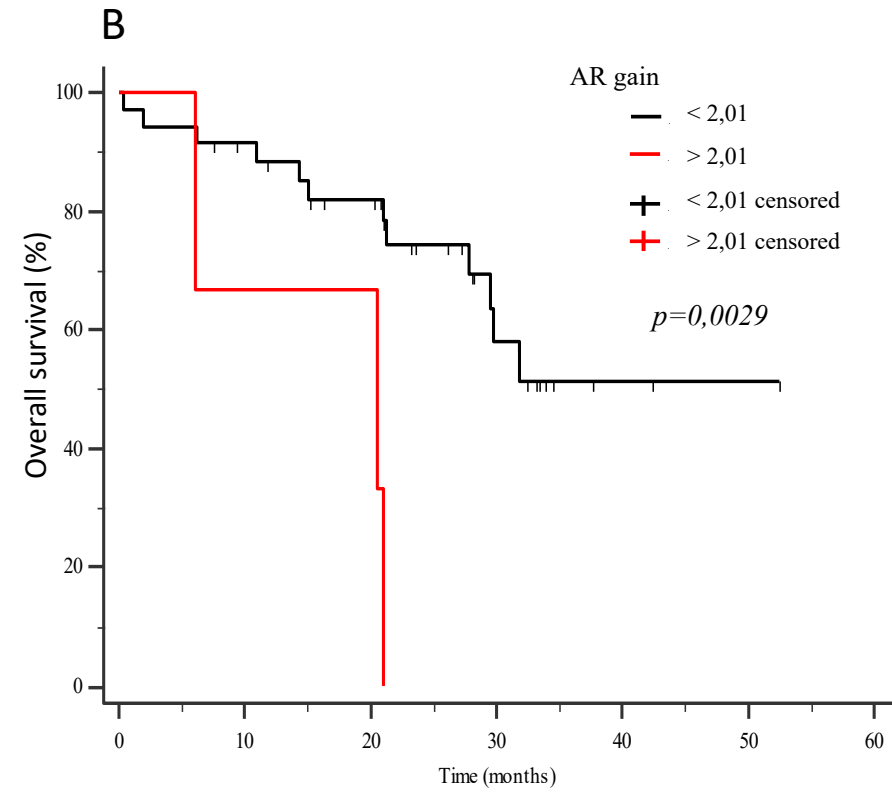

### AR-gain PFS ENZALUTAMIDE

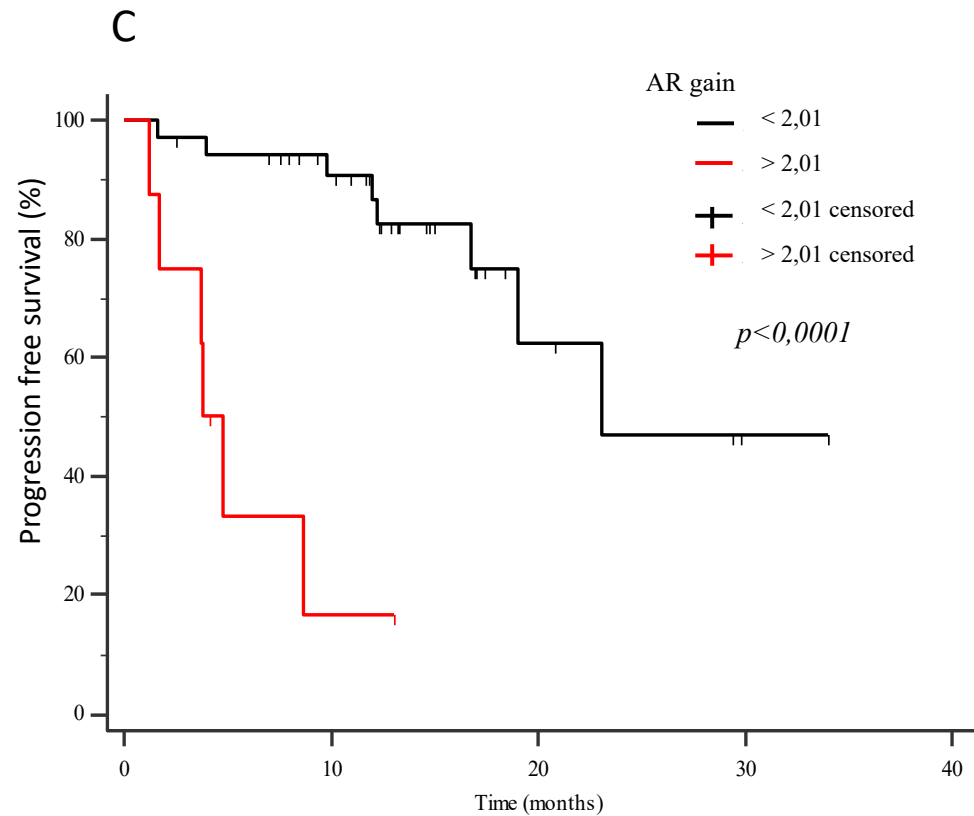

### AR-gain OS ENZALUTAMIDE

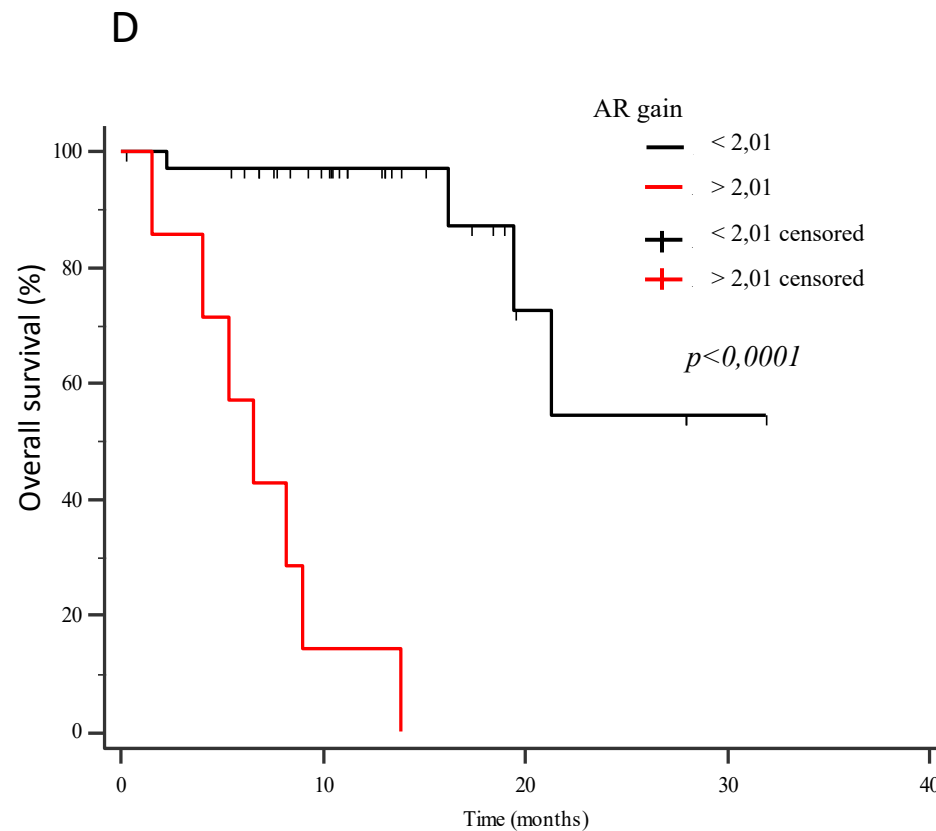

Supplement: 41391_2020_309_MOESM2_ESM.pdf [file 41391_2020_309_MOESM2_ESM.pdf]
